# Supplementary material for: Clinical Remission in Severe Asthma: A Comparative Analysis of Patients with and Without Biologics from the Swiss Severe Asthma Registry
Source: MDPI journal article supplement (doi:10.3390/biomedicines13123074), 2025-12-12
Supplement: s1 [file biomedicines-3976365-supplementary.pdf › biomedicines-3976365-supplementary.pdf]

### Supplementary Material

**Table S1.** Imputed and non-imputed variables used for the regression models including the extent of missingness per variable.

| Variable                                | N missing | N Total | % Missing | Data type   | Imputation |
|-----------------------------------------|-----------|---------|-----------|-------------|------------|
| BEC                                     | 200       | 394     | 50.76     | Numerical   | No         |
| Biologic duration                       | 96        | 394     | 24.37     | Numerical   | No         |
| Asthma in Relatives                     | 55        | 394     | 13.96     | Categorical | No         |
| BEC prior Biologics                     | 45        | 394     | 11.42     | Numerical   | No         |
| FEV1 (% predicted)                      | 27        | 394     | 6.85      | Numeric     | Yes        |
| FEV 1 (l)                               | 25        | 394     | 6.35      | Numeric     | Yes        |
| Beclomethasone equivalent               | 24        | 394     | 6.09      | Numeric     | Yes        |
| Number of Exacerbations                 | 16        | 394     | 4.06      | Numeric     | Yes        |
| ACT Score                               | 12        | 394     | 3.05      | Numeric     | Yes        |
| Childhood onset                         | 9         | 394     | 2.28      | Categorical | Yes        |
| Lowest FEV 1 last 2 years (l)           | 8         | 394     | 2.03      | Numeric     | Yes        |
| Lowest FEV 1 last 2 years (% predicted) | 7         | 394     | 1.78      | Numeric     | Yes        |
| GERD                                    | 5         | 394     | 1.27      | Categorical | Yes        |
| Nasal Polys                             | 4         | 394     | 1.02      | Categorical | Yes        |
| COPD                                    | 4         | 394     | 1.02      | Categorical | Yes        |
| Depression                              | 4         | 394     | 1.02      | Categorical | Yes        |
| Allergies                               | 3         | 394     | 0.76      | Categorical | Yes        |
| BMI                                     | 2         | 394     | 0.51      | Numeric     | Yes        |
| OCS                                     | 1         | 394     | 0.25      | Categorical | Yes        |
| Age                                     | 0         | 394     | 0         | Other       | Yes        |
| Sex                                     | 0         | 394     | 0         | Categorical | Yes        |
| Biologic treatment                      | 0         | 394     | 0         | Other       | Yes        |
| Biologic past                           | 0         | 394     | 0         | Other       | Yes        |

**Abbreviations:** BEC: Blood Eosinophil Count; BMI: Body Mass Index; COPD: Chronic Obstructive Pulmonary Disease; GERD: Gastroesophageal Reflux Disease; ICS: Inhaled Corticosteroids; OCS: Oral Corticosteroids. Childhood onset: before the age of 12. Asthma in first degree relatives (mother, father, siblings, own children).

**Table S2.** Full table of patient characteristics in both groups.

|                                                  | Biologic-Naïve<br>(n= 96) | Biologic-Treated<br>(n= 298) | p-value |
|--------------------------------------------------|---------------------------|------------------------------|---------|
| Female, n (%)                                    | 51 (53.1%)                | 131 (44%)                    | 0.15    |
| Age, Mean (SD)                                   | 52.92 (16.02)             | 55.63 (15.67)                | 0.13    |
| BMI, Mean (SD)                                   | 26.86 (5.73)              | 27.85 (5.71)                 | 0.06    |
| Underweight, n (%)                               | 5 (5.2%)                  | 8 (2.7%)                     |         |
| Normal weight, n (%)                             | 24 (25%)                  | 110 (37.2%)                  | 0.11    |
| Overweight, n (%)                                | 37 (38.5%)                | 106 (35.8%)                  |         |
| Obese, n (%)                                     | 30 (31.2%)                | 72 (24.3%)                   |         |
| <b>Type of Asthma</b>                            |                           |                              |         |
| Allergic, n (%)                                  | 33 (34.4)                 | 147 (49.3)                   |         |
| Non-Allergic, n (%)                              | 43 (44.8)                 | 96 (32.2)                    | 0.02    |
| Mixed, n (%)                                     | 20 (20.8)                 | 55 (18.5)                    |         |
| <b>Asthma and family history</b>                 |                           |                              |         |
| Childhood-Onset <sup>a</sup> , n (%)             | 69 (23.7)                 | 24 (25.5)                    | 0.82    |
| Duration of Asthma, geom.mean (GSD) <sup>b</sup> | 5.84 (2.7)                | 11.09 (2.36)                 | < 0.001 |

|                                                           | Biologic-Naïve<br>(n= 96) | Biologic-Treated<br>(n= 298) | p-value |
|-----------------------------------------------------------|---------------------------|------------------------------|---------|
| <b>Vaccination Status</b>                                 |                           |                              |         |
| Pneumococcus, n (%)                                       | 23 (24.5)                 | 73 (24.7)                    | 0.84    |
| Influenza, n (%)                                          | 44 (46.3)                 | 179 (60.5)                   | < 0.01  |
| <b>Smoking Status</b>                                     |                           |                              |         |
| Lifelong Non-Smoker, n (%)                                | 52 (54.2)                 | 159 (53.4)                   |         |
| Former-Smoker, n (%)                                      | 29 (30.2)                 | 118 (39.6)                   | 0.02    |
| Current Smoker, n (%)                                     | 15 (15.6)                 | 21 (7)                       |         |
| <b>Disease Burden</b>                                     |                           |                              |         |
| Patients that miss Work/School, n (%)                     | 17 (17.9)                 | 47 (15.9)                    | 0.77    |
| ACT Score, mean (SD)                                      | 17.23 (4.45)              | 19.98 (4.68)                 | < 0.001 |
| No Symptoms, n (%)                                        | 4 (4.2)                   | 69 (23.2)                    | < 0.001 |
| <b>Exacerbations in the previous year</b>                 |                           |                              |         |
| Number of Exacerbations, geom. mean (GSD) b               | 1.09 (2.02)               | 0.49 (1.80)                  | < 0.001 |
| No Exacerbation                                           | 38 (39.6)                 | 187 (62.8%)                  |         |
| ≤ 2 Exacerbations per year                                | 32 (33.3)                 | 81 (27.2%)                   | < 0.001 |
| > 2 Exacerbations per year                                | 26 (27.01)                | 30 (10.1%)                   |         |
| <b>Medication</b>                                         |                           |                              |         |
| High-dose ICS, n (%)                                      | 68 (78.2%)                | 253 (89.4%)                  | 0.01    |
| Beclomethasone Equivalent (µg/day) , Mean (SD)            | 1417 (786)                | 1345 (873)                   | 0.33    |
| OCS, n (%)                                                | 17 (17.9)                 | 52 (17.4)                    | 1       |
| Prednisolone Equivalent (mg/day), Mean (SD)               | 14.4 (12.8)               | 11.6 (15)                    | 0.03    |
| <b>Pulmonary Function</b>                                 |                           |                              |         |
| FEV1 (l) , Mean (SD)                                      | 2.23 (0.76)               | 2.43 (0.87)                  | 0.10    |
| FEV1 (% predicted) , Mean (SD)                            | 72.33 (19.55)             | 77.59 (20.38)                | < 0.01  |
| FVC (l) , Mean (SD)                                       | 3.33 (0.93)               | 3.58 (0.99)                  | 0.07    |
| FVC (% predicted), Mean (SD)                              | 86.33 (15.92)             | 90.92 (16.05)                | 0.01    |
| Lowest FEV1 in the last 2 years (l) , Mean (SD)           | 1.98 (0.68)               | 2.07 (0.84)                  | 0.73    |
| Lowest FEV1 in the last 2 years (% predicted) , Mean (SD) | 65.51 (20.10)             | 65.33 (20.58)                | 0.91    |
| BHR, n (%)                                                | 31 (33)                   | 88 (29.5)                    | 0.61    |
| <b>Laboratory findings</b>                                |                           |                              |         |
| Current BEC (cells/µL), geom.mean (GSD)b                  | 203.34 ± 5.23             | 29.57 ± 13.93                | < 0.001 |
| <b>Remission Criteria</b>                                 |                           |                              |         |
| ACT Score ≥ 20, n (%)                                     | 31 (33.7%)                | 190 (65.5%)                  | < 0.001 |
| No OCS, n (%)                                             | 79 (82.3)                 | 246 (82.6)                   | 1       |
| FEV1 > 80% predicted, n (%)                               | 26 (27.1)                 | 132 (44.3)                   | < 0.01  |
| No Exacerbations, n (%)                                   | 35 (36.5)                 | 178 (59.7)                   | < 0.001 |
| Fulfilling all 4 remission criteria, n (%) <sup>c</sup>   | 6 (6.2)                   | 72 (24.2)                    | < 0.001 |
| Fulfilling 3 remission criteria, n (%) <sup>d</sup>       | 15 (15.6)                 | 136 (45.7)                   | < 0.001 |
| <b>Co-Morbidities</b>                                     |                           |                              |         |
| Allergies, n (%)                                          | 45 (48.4)                 | 158 (53)                     | 0.51    |
| Sinusitis, n (%)                                          | 33 (35.5%)                | 143 (48.1%)                  | 0.04    |
| Nasal Polyps, n (%)                                       | 14 (15.1%)                | 117 (39.4%)                  | < 0.001 |
| GERD, n (%)                                               | 19 (20.4%)                | 79 (26.7%)                   | 0.28    |
| Depression, n (%)                                         | 13 (14%)                  | 31 (10.4%)                   | 0.45    |
| COPD, n (%)                                               | 12 (12.9%)                | 30 (10.1%)                   | 0.56    |
| EGPA, n (%)                                               | 1 (1.1%)                  | 17 (5.7%)                    | 0.08    |
| ABPA, n (%)                                               | 5 (5.4%)                  | 9 (3%)                       | 0.45    |
| Bronchiectasis of unknown origin, n (%)                   | 6 (6.5%)                  | 24 (8.1%)                    | 0.77    |
| > 2 LRTIs/ year, n (%)                                    | 14 (15.1%)                | 44 (14.8%)                   | 1       |

|  | Biologic-Naïve<br>(n= 96) | Biologic-Treated<br>(n= 298) | p-value |
|--|---------------------------|------------------------------|---------|
|--|---------------------------|------------------------------|---------|

**Abbreviations:** ABPA: Allergic bronchopulmonary aspergillosis; ACT: Asthma Control Test; BEC: Blood Eosinophil Count; BHR: Bronchial Hyperresponsiveness; BMI: Body Mass Index; COPD: Chronic Obstructive Pulmonary Disease; EGPA: Eosinophilic Granulomatosis with Polyangiitis; GERD: Gastroesophageal Reflux Disease; ICS: Inhaled Corticosteroids; LRTI: Lower Respiratory Tract Infection; OCS: Oral Corticosteroids.

<sup>a</sup> Childhood onset: before the age of 12. BMI categories: Underweight BMI < 17.5 kg/m<sup>2</sup> ; Normal Weight BMI 17.5-25 kg/m<sup>2</sup>; Overweight BMI 15-30 kg/m<sup>2</sup> ; Obese > 30 kg/m<sup>2</sup>

<sup>b</sup> geometric mean and geometric standard deviation (GSD) was used, if the variable was not normally distributed

<sup>c</sup> Remission with 4 criteria: ACT controlled, no exacerbations, no OCS, FEV1 > 80 % predicted

<sup>d</sup> Remission with 3 criteria: ACT controlled, no exacerbations, no OCS,

**Table S3.** Predictors for Asthma Control (ACT score ≥ 20): Logistic Regression Results with Robust Standard Errors, imputed vs. complete case.

|                          | Imputed Data Set |                  |                  |              | Complete Case |                  |                  |              |
|--------------------------|------------------|------------------|------------------|--------------|---------------|------------------|------------------|--------------|
|                          | OR               | 95 % CI<br>lower | 95 % CI<br>upper | p- value     | OR            | 95 % CI<br>lower | 95 % CI<br>upper | p- value     |
| Allergies                | 0.456            | 0.195            | 1.066            | 0.07         | 0.515         | 0.219            | 1.211            | 0.128        |
| Age                      | 0.996            | 0.971            | 1.022            | 0.783        | 1.001         | 0.974            | 1.028            | 0.951        |
| Asthma in Relatives      | 0.562            | 0.275            | 1.148            | 0.114        | 0.522         | 0.24             | 1.138            | 0.102        |
| BMI                      | 0.977            | 0.916            | 1.043            | 0.484        | 0.977         | 0.913            | 1.045            | 0.489        |
| Biologic Treatment       | 3.959            | 1.483            | 10.564           | <b>0.006</b> | 3.516         | 1.256            | 9.838            | <b>0.017</b> |
| Childhood Onset          | 1.02             | 0.443            | 2.348            | 0.963        | 1.252         | 0.494            | 3.173            | 0.636        |
| BEC                      | 1                | 1                | 1                | 0.952        | 1             | 0.999            | 1.001            | 0.94         |
| Female Sex               | 0.85             | 0.41             | 1.763            | 0.662        | 1.16          | 0.533            | 2.523            | 0.709        |
| High Dose ICS            | 1.198            | 0.326            | 4.4              | 0.786        | 1.122         | 0.287            | 4.388            | 0.868        |
| COPD                     | 0.124            | 0.015            | 1.044            | 0.055        | 0.145         | 0.016            | 1.305            | 0.085        |
| Depression               | 0.317            | 0.059            | 1.705            | 0.181        | 0.574         | 0.112            | 2.934            | 0.504        |
| GERD                     | 1.021            | 0.449            | 2.322            | 0.961        | 1.133         | 0.48             | 2.672            | 0.776        |
| Nasal Polyps             | 1.59             | 0.747            | 3.387            | 0.229        | 1.573         | 0.69             | 3.585            | 0.281        |
| Lowest FEV1 (%predicted) | 1.006            | 0.99             | 1.022            | 0.457        | 1.013         | 0.996            | 1.031            | 0.124        |
| Biologic Switcher        | 0.386            | 0.17             | 0.879            | <b>0.023</b> | 0.397         | 0.162            | 0.975            | <b>0.044</b> |

**Abbreviations:** BEC: Blood Eosinophil Count; BMI: Body Mass Index; COPD: Chronic Obstructive Pulmonary Disease; GERD: Gastroesophageal Reflux Disease; ICS: Inhaled Corticosteroids; OCS: Oral Corticosteroids. Childhood onset: before the age of 12. Asthma in first degree relatives (mother, father, siblings, own children). **Model Specifications:** GLM; Family Binominal, Link Function: Logit; Estimation Maximum Likelihood with robust standard errors. **Outcome:** Asthma Control (ACT score ≥ 20).

**Table S4.** Predictors for No OCS use: Logistic Regression Results with Robust Standard Errors, imputed vs. complete case.

|                     | Imputed Data Set |                  |                  |              | Complete Case |                  |                  |              |
|---------------------|------------------|------------------|------------------|--------------|---------------|------------------|------------------|--------------|
|                     | OR               | 95 % CI<br>lower | 95 % CI<br>upper | p- value     | OR            | 95 % CI<br>lower | 95 % CI<br>upper | p- value     |
| Allergies           | 0.712            | 0.273            | 1.859            | 0.488        | 0.803         | 0.301            | 2.143            | 0.661        |
| Age                 | 0.987            | 0.95             | 1.025            | 0.489        | 0.991         | 0.954            | 1.029            | 0.629        |
| Asthma in Relatives | 1.057            | 0.431            | 2.595            | 0.903        | 1.628         | 0.567            | 4.675            | 0.365        |
| BMI                 | 1.144            | 1.035            | 1.264            | <b>0.009</b> | 1.151         | 1.031            | 1.285            | <b>0.012</b> |
| Biologic Treatment  | 6.268            | 1.983            | 19.813           | <b>0.002</b> | 11.518        | 2.796            | 47.454           | <b>0.001</b> |
| Childhood Onset     | 1.597            | 0.366            | 6.96             | 0.533        | 1.08          | 0.24             | 4.849            | 0.92         |
| BEC                 | 1.001            | 0.999            | 1.003            | 0.204        | 1.001         | 0.999            | 1.003            | 0.31         |

|                          |       |       |       |              |       |       |       |              |
|--------------------------|-------|-------|-------|--------------|-------|-------|-------|--------------|
| Female Sex               | 1.096 | 0.386 | 3.116 | 0.863        | 0.834 | 0.288 | 2.417 | 0.738        |
| High Dose ICS            | 0.877 | 0.142 | 5.435 | 0.888        | 0.544 | 0.057 | 5.179 | 0.596        |
| COPD                     | 0.343 | 0.077 | 1.525 | 0.16         | 0.22  | 0.044 | 1.093 | 0.064        |
| Depression               | 0.816 | 0.139 | 4.799 | 0.822        | 0.577 | 0.082 | 4.071 | 0.581        |
| GERD                     | 0.587 | 0.174 | 1.985 | 0.392        | 0.424 | 0.138 | 1.302 | 0.134        |
| Nasal Polyps             | 0.924 | 0.352 | 2.423 | 0.872        | 0.792 | 0.284 | 2.209 | 0.656        |
| Lowest FEV1 (%predicted) | 1.024 | 1     | 1.049 | 0.055        | 1.019 | 0.992 | 1.046 | 0.177        |
| Biologic Switcher        | 0.203 | 0.062 | 0.672 | <b>0.009</b> | 0.148 | 0.038 | 0.568 | <b>0.005</b> |

**Abbreviations:** BEC: Blood Eosinophil Count; BMI: Body Mass Index; COPD: Chronic Obstructive Pulmonary Disease; GERD: Gastroesophageal Reflux Disease; ICS: Inhaled Corticosteroids; OCS: Oral Corticosteroids. Childhood onset: before the age of 12. Asthma in first degree relatives (mother, father, siblings, own children). **Model Specifications:** GLM; Family Binominal, Link Function: Logit; Estimation Maximum Likelihood with robust standard errors. **Outcome:** No OCS use.

**Table S5.** Predictors for FEV1 > 80 % predicted: Logistic Regression Results with Robust Standard Errors, imputed vs. complete case.

|                          | Imputed Data Set |               |               |                   | Complete Case |               |               |                   |
|--------------------------|------------------|---------------|---------------|-------------------|---------------|---------------|---------------|-------------------|
|                          | OR               | 95 % CI lower | 95 % CI upper | p- value          | OR            | 95 % CI lower | 95 % CI upper | p- value          |
| Allergies                | 0.507            | 0.162         | 1.586         | 0.243             | 0.523         | 0.149         | 1.832         | 0.311             |
| Age                      | 1.016            | 0.986         | 1.046         | 0.291             | 1.006         | 0.974         | 1.038         | 0.719             |
| Asthma in Relatives      | 1.131            | 0.378         | 3.379         | 0.825             | 0.918         | 0.257         | 3.272         | 0.895             |
| BMI                      | 0.99             | 0.913         | 1.084         | 0.916             | 0.968         | 0.888         | 1.056         | 0.464             |
| Biologic Treatment       | 4.423            | 1.392         | 14.056        | <b>0.011</b>      | 5.503         | 1.439         | 21.052        | <b>0.013</b>      |
| Childhood Onset          | 1.03             | 0.338         | 3.147         | 0.955             | 0.812         | 0.294         | 2.246         | 0.689             |
| BEC                      | 1                | 0.999         | 1             | 0.074             | 1             | 0.999         | 1             | 0.2               |
| Female Sex               | 2.465            | 0.872         | 6.964         | 0.088             | 2.831         | 0.95          | 8.435         | 0.062             |
| High Dose ICS            | 0.372            | 0.072         | 1.910         | 0.236             | 0.388         | 0.087         | 1.742         | 0.217             |
| COPD                     | 0.216            | 0.043         | 1.072         | 0.061             | 0.42          | 0.092         | 1.922         | 0.264             |
| Depression               | 0.368            | 0.076         | 1.777         | 0.213             | 0.209         | 0.042         | 1.047         | 0.057             |
| GERD                     | 0.181            | 0.049         | 0.666         | <b>0.010</b>      | 0.282         | 0.068         | 1.164         | 0.08              |
| Nasal Polyps             | 1.306            | 0.402         | 4.243         | 0.656             | 0.916         | 0.276         | 3.044         | 0.886             |
| Lowest FEV1 (%predicted) | 1.139            | 1.091         | 1.191         | <b>&lt; 0.001</b> | 1.124         | 1.075         | 1.174         | <b>&lt; 0.001</b> |
| Biologic Switcher        | 0.443            | 0.139         | 1.403         | 0.166             | 0.393         | 0.119         | 1.293         | 0.124             |

**Abbreviations:** BEC: Blood Eosinophil Count; BMI: Body Mass Index; COPD: Chronic Obstructive Pulmonary Disease; GERD: Gastroesophageal Reflux Disease; ICS: Inhaled Corticosteroids; OCS: Oral Corticosteroids. Childhood onset: before the age of 12. Asthma in first degree relatives (mother, father, siblings, own children). **Model Specifications:** GLM; Family Binominal, Link Function: Logit; Estimation Maximum Likelihood with robust standard errors. **Outcome:** FEV1 > 80 % predicted.

**Table S6.** Predictors for Absence of Exacerbations: Logistic Regression Results with Robust Standard Errors, imputed vs. complete case.

|                     | Imputed Data Set |               |               |          | Complete Case |               |               |          |
|---------------------|------------------|---------------|---------------|----------|---------------|---------------|---------------|----------|
|                     | OR               | 95 % CI lower | 95 % CI upper | p- value | OR            | 95 % CI lower | 95 % CI upper | p- value |
| Allergies           | 0.827            | 0.389         | 1.759         | 0.623    | 0.62          | 0.278         | 1.383         | 0.243    |
| Age                 | 1.00             | 0.975         | 1.026         | 0.968    | 1.009         | 0.981         | 1.037         | 0.531    |
| Asthma in Relatives | 0.613            | 0.300         | 1.252         | 0.179    | 0.648         | 0.301         | 1.393         | 0.266    |

|                                 |       |       |        |              |       |       |        |              |
|---------------------------------|-------|-------|--------|--------------|-------|-------|--------|--------------|
| <b>BMI</b>                      | 0.996 | 0.933 | 1.064  | 0.927        | 1.006 | 0.939 | 1.078  | 0.87         |
| <b>Biologic Treatment</b>       | 5.107 | 2.007 | 12.996 | <b>0.001</b> | 5.124 | 1.961 | 13.389 | <b>0.001</b> |
| <b>Childhood Onset</b>          | 0.685 | 0.296 | 1.583  | 0.377        | 0.814 | 0.323 | 2.049  | 0.662        |
| <b>BEC</b>                      | 1     | 1     | 1.001  | 0.290        | 1     | 1     | 1.001  | 0.705        |
| <b>Female Sex</b>               | 0.856 | 0.421 | 1.742  | 0.668        | 0.819 | 0.38  | 1.766  | 0.61         |
| <b>High Dose ICS</b>            | 2.112 | 0.559 | 7.982  | 0.270        | 1.561 | 0.359 | 6.788  | 0.552        |
| <b>COPD</b>                     | 0.427 | 0.111 | 1.643  | 0.216        | 0.228 | 0.042 | 1.223  | 0.084        |
| <b>Depression</b>               | 3.404 | 0.962 | 12.04  | 0.057        | 3.855 | 0.922 | 16.11  | 0.064        |
| <b>GERD</b>                     | 1.492 | 0.688 | 3.233  | 0.309        | 1.497 | 0.676 | 3.316  | 0.32         |
| <b>Nasal Polyps</b>             | 1.03  | 0.498 | 2.145  | 0.927        | 0.824 | 0.373 | 1.82   | 0.633        |
| <b>Lowest FEV1 (%predicted)</b> | 1.004 | 0.988 | 1.021  | 0.576        | 1.005 | 0.988 | 1.022  | 0.55         |
| <b>Biologic Switcher</b>        | 0.627 | 0.281 | 1.396  | 0.253        | 0.569 | 0.228 | 1.419  | 0.226        |

**Abbreviations:** BEC: Blood Eosinophil Count; BMI: Body Mass Index; COPD: Chronic Obstructive Pulmonary Disease; GERD: Gastroesophageal Reflux Disease; ICS: Inhaled Corticosteroids; OCS: Oral Corticosteroids. Childhood onset: before the age of 12. Asthma in first degree relatives (mother, father, siblings, own children). **Model Specifications:** GLM; Family Binominal, Link Function: Logit; Estimation Maximum Likelihood with robust standard errors. **Outcome:** Absence of Exacerbations.
